# Supplementary material for: Enhancement of Breast Cancer Cell Aggressiveness by lncRNA H19 and its Mir-675 Derivative: Insight into Shared and Different Actions
Source: Cancers (Basel). 2020 Jun 29;12(7):1730. doi: 10.3390/cancers12071730 (PMC7407157; doi:10.3390/cancers12071730)
Supplement: Supplementary file 1 [file cancers-12-01730-s001.pdf]

# Supplementary Materials: Enhancement of Breast Cancer Cell Aggressiveness by lncRNA H19 and its miR-675 Derivative: Insight into Shared and Different Actions

Evodie Peperstraete, Clément Lecerf, Jordan Collette, Constance Vennin, Ludivine Raby, Pamela Völkel, Pierre-Olivier Angrand, Marie Winter, François Bertucci, Pascal Finetti, Chann Lagadec, Samuel Meignan, Roland P. Bourette, Xuefen Le Bourhis and Eric Adriaenssens

**Table S1.** References of *H19* siRNA transient transfection.

| siRNA | References                |
|-------|---------------------------|
| siNeg | SR-CL000-005 (Eurogentec) |
| siH19 | ACGAGGCCAGGUCUCCAGCUG     |

**Table S2.** Primers used for qRT-PCR.

| Primers         | Sequence 5' to 3'        |
|-----------------|--------------------------|
| RPLP0 reverse   | GATGACCAGCCCAAAGGAGA     |
| RPLP0 forward   | GTGATGTGCAGCTGATCAAGACT  |
| H19 reverse     | TACAACCACTGCACTACCTG     |
| H19 forward     | TGCCCATGAAGATGGAGTCG     |
| Sox2 reverse    | CGGGGCCGGTATTATAATC      |
| Sox2 forward    | TAACCCCAAGATGCACAACCTC   |
| Oct 3/4 reverse | GTGAAGTGAGGGCTCCCATA     |
| Oct3/4 forward  | GAAGGATGTGGTCCGAGTGT     |
| Abcg2 reverse   | GCTGCAAAGCCGTAAATCCATATC |
| Abcg2 forward   | ACAACCATTGCATCTTGGCTGTC  |
| Notch1 reverse  | CTGTGAGGAAAATATCGAC      |
| Notch1 forward  | GTACTGACCTGTCCACTCT      |
| Nanog reverse   | ACACAGTGGGCCTGAAGA       |
| Nanog forward   | GTGATTGTGGGCCTGAAGA      |
| Aldh1a1 reverse | CCCACTCTCAATGAGGTCAAG    |
| Aldh1a1 forward | GTTGAGCGGGCTAAGAAGTAT    |
| Aldh1a3 reverse | ATAAAGGGCGGTGAGAGGTGTCT  |
| Aldh1a3 forward | ACCATCCCCACAGATGACAAC    |

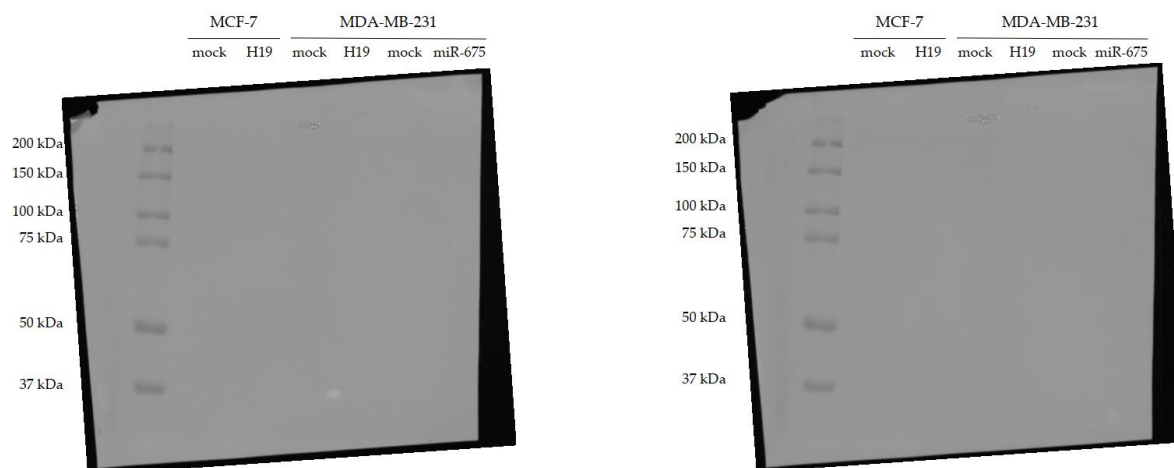

**Figure S1.** Uncropped western blot membranes (visible condition) corresponding to Figure S2.

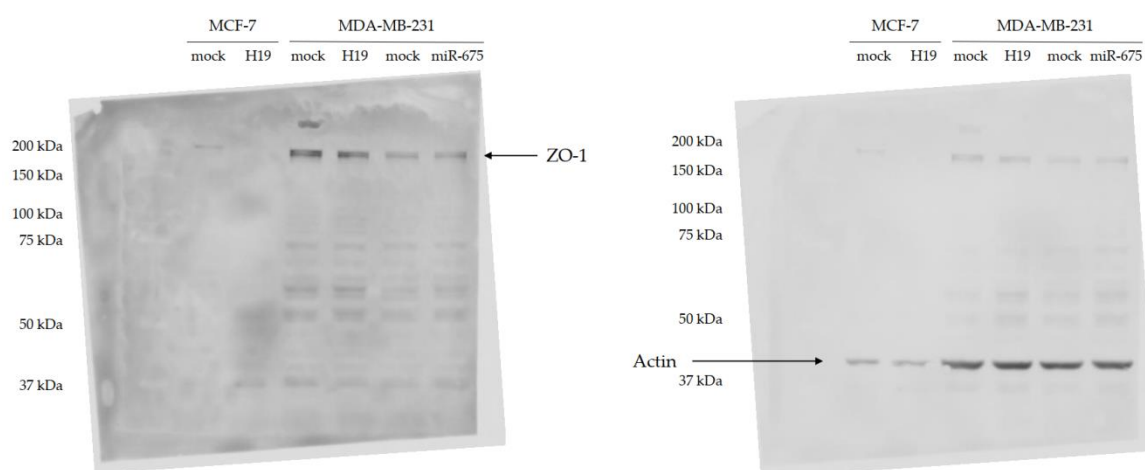

**Figure S2.** Revelation of uncropped western blot membranes showing the detection of ZO-1 protein expression in MCF-7 control (mock) or *H19*-stably overexpressing cells (H19), and in MDA-MB-231 control (mock), *H19*-stably overexpressing cells (H19) or miR-675-stably overexpressing cells (miR-675). Actin was used as an equilloading control.

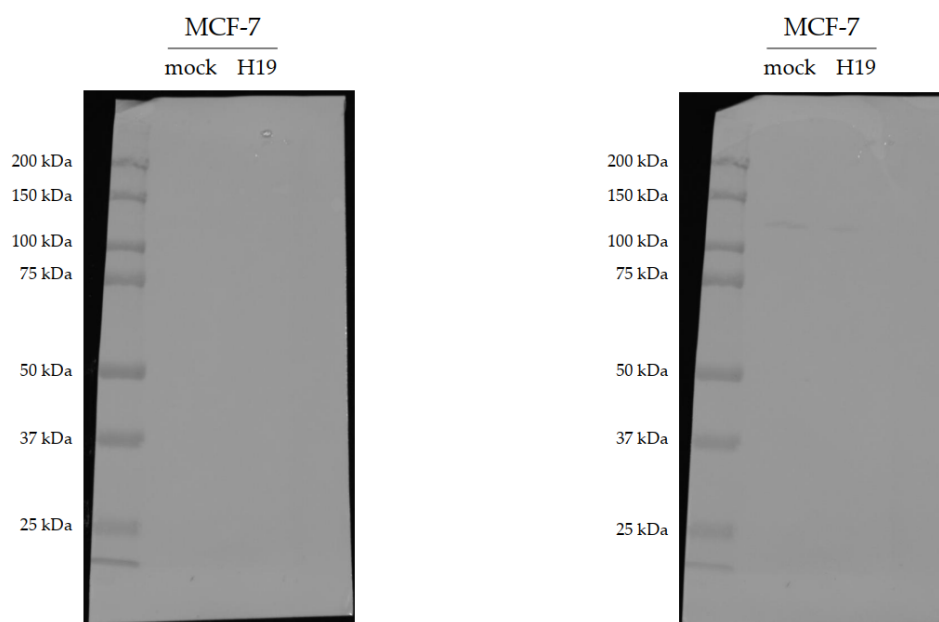

**Figure S3.** Uncropped western blot membranes (visible condition) corresponding to Figure S4.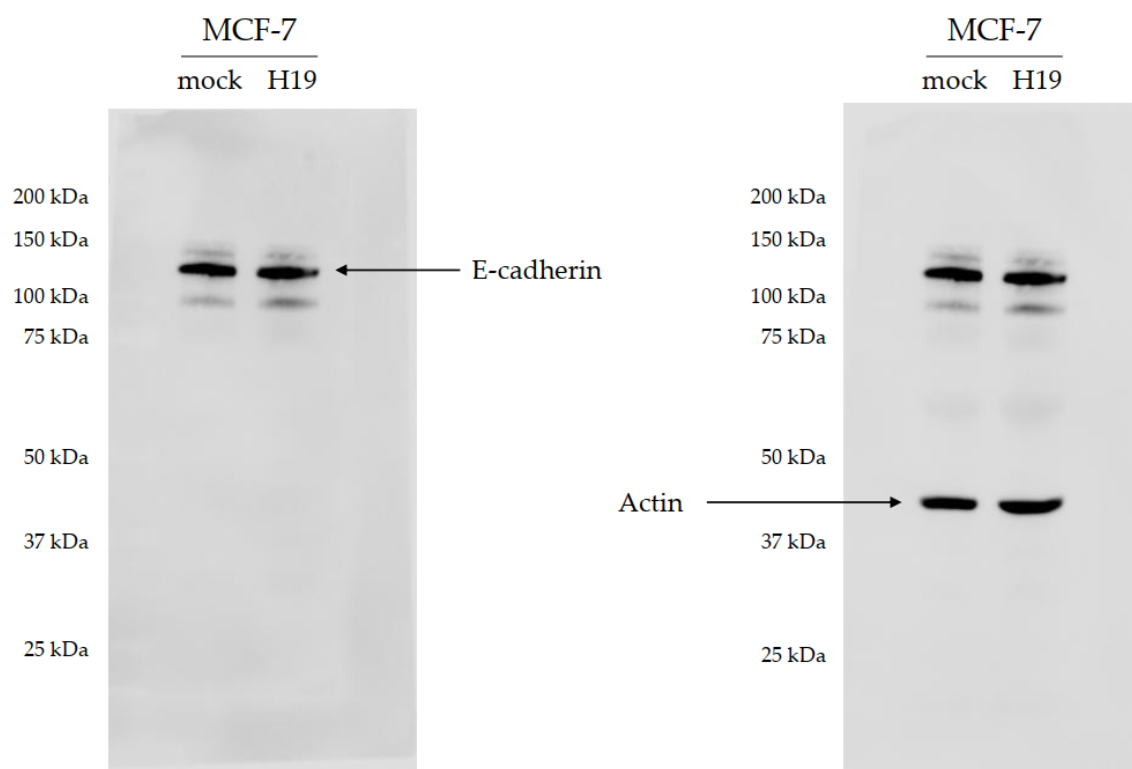**Figure S4.** Revelation of uncropped western blot membranes showing the detection of E-cadherin protein expression in MCF-7 control (mock) or *H19*-stably overexpressing cells (H19). Actin was used as an equiloading control.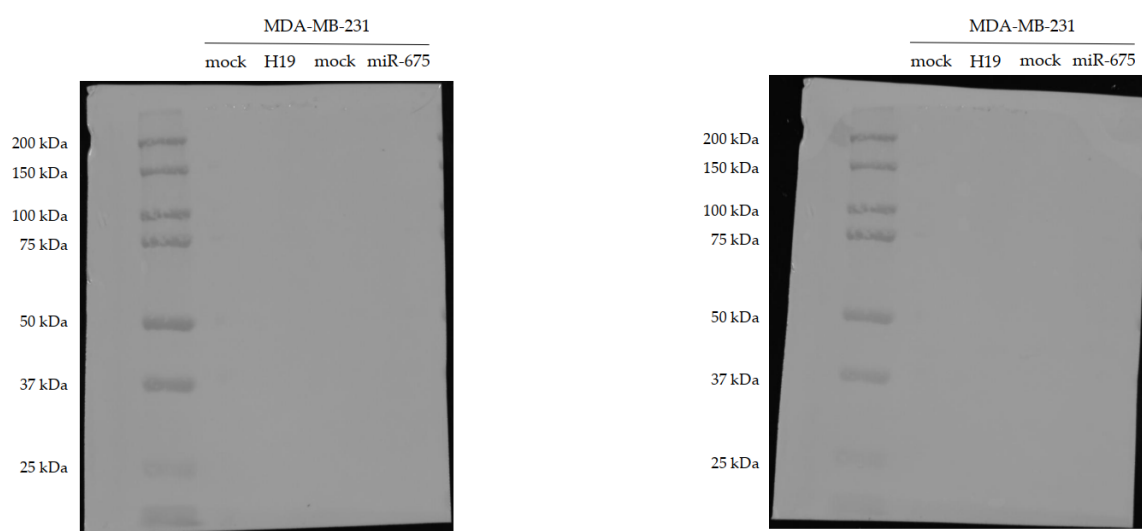**Figure S5.** Uncropped western blot membranes (visible condition) corresponding to Figure S6.

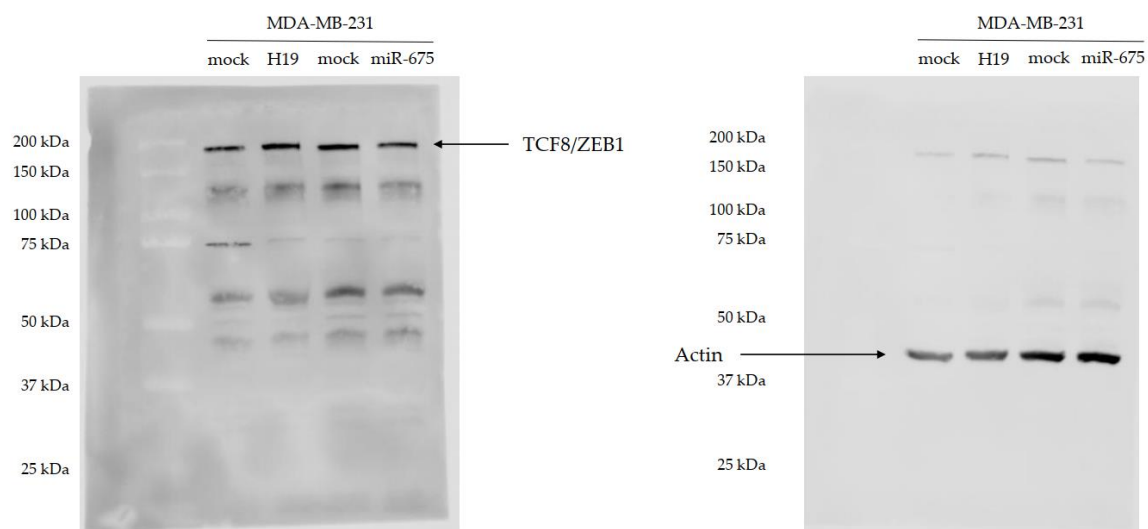

**Figure S6.** Revelation of uncropped western blot membranes showing the detection of TCF8/ZEB1 protein expression in MDA-MB-231 control (mock), *H19*-stably overexpressing cells (H19) or miR-675-stably overexpressing cells (miR-675). Actin was used as an equiloading control.

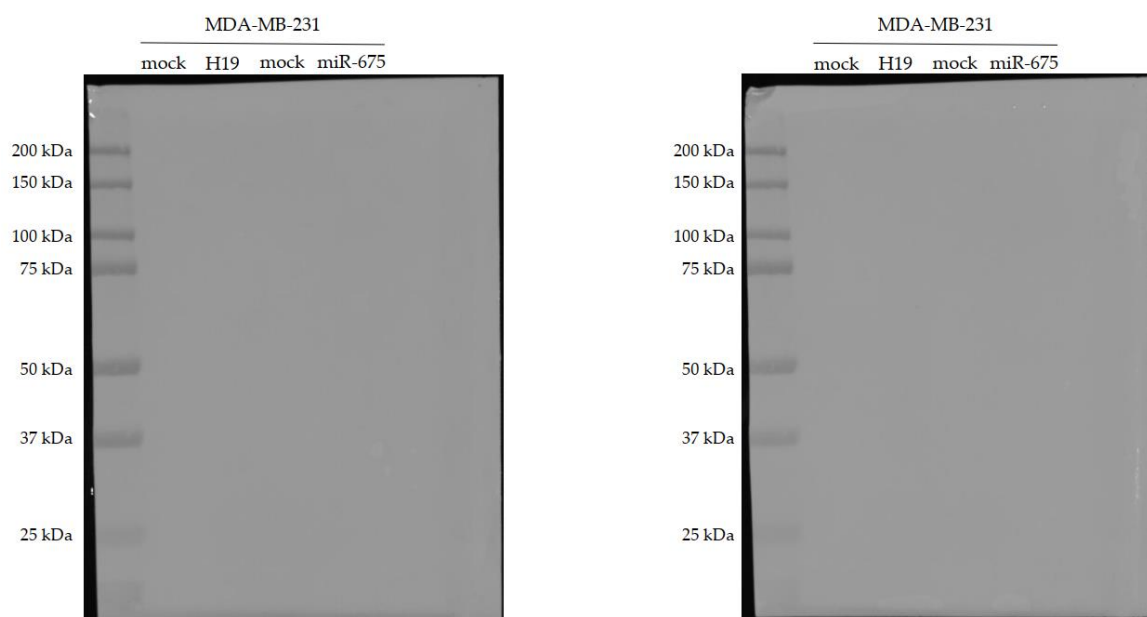

**Figure S7.** Uncropped western blot membranes (visible condition) corresponding to Figure S8.

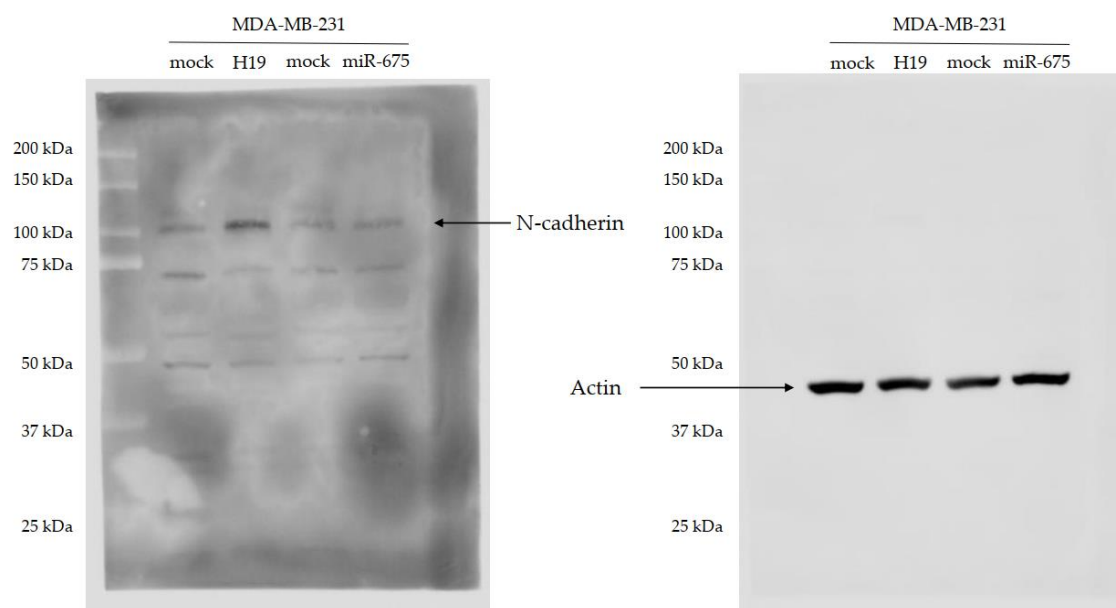

**Figure S8.** Revelation of uncropped western blot membranes showing the detection of N-cadherin protein expression in MDA-MB-231 control (mock), *H19*-stably overexpressing cells (H19) or miR-675-stably overexpressing cells (miR-675). Actin was used as an equiloading control.

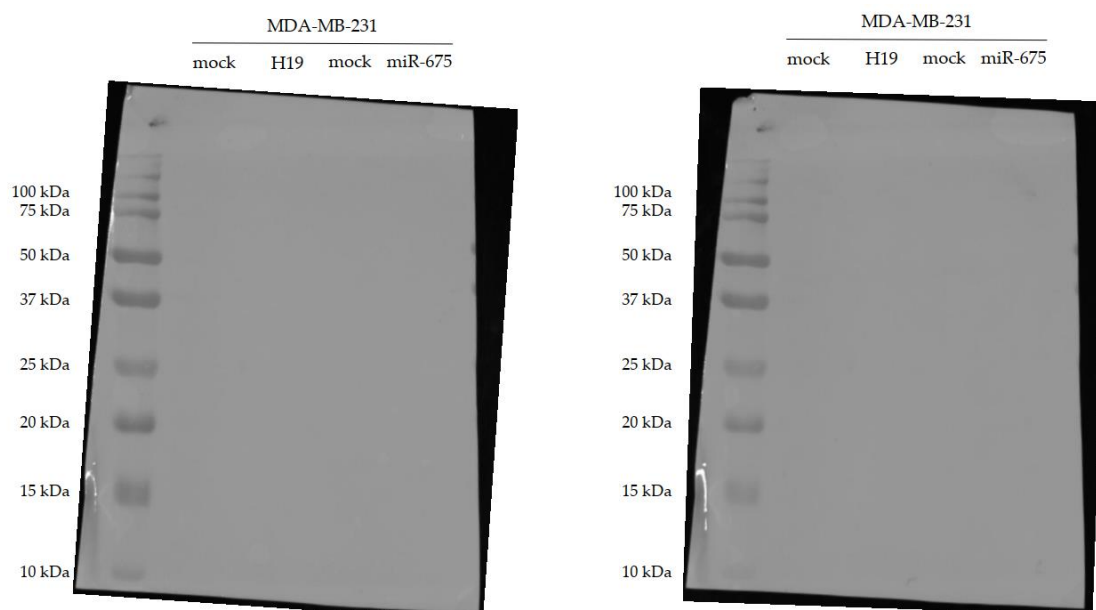

**Figure S9.** Uncropped western blot membranes (visible condition) corresponding to Figure S10.

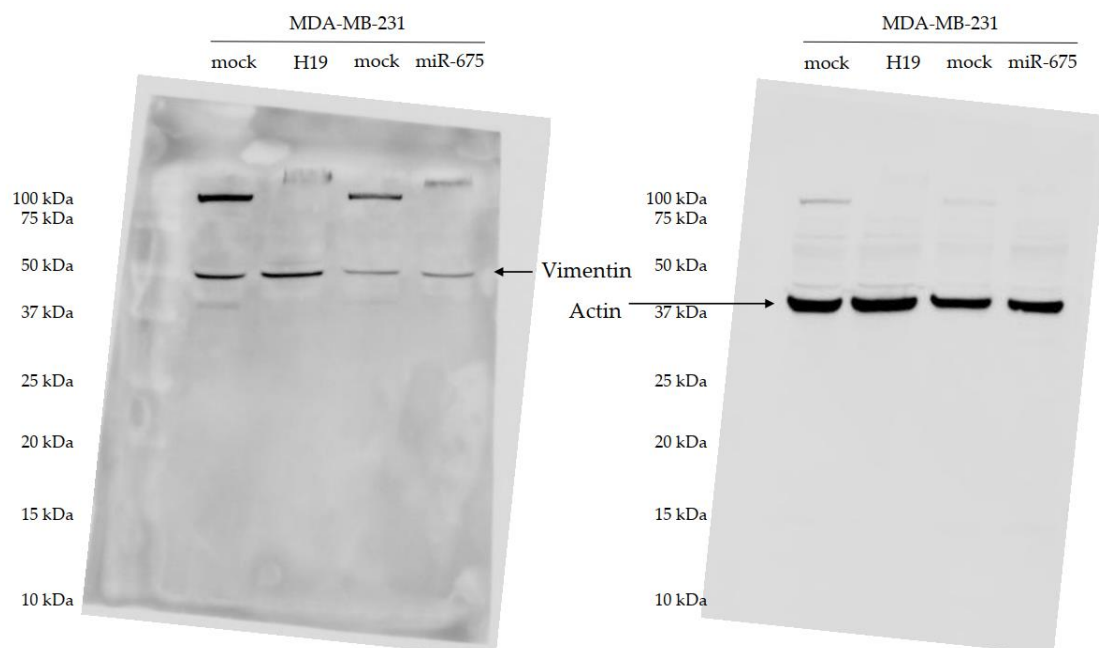

**Figure S10.** Revelation of uncropped western blot membranes showing the detection of vimentin protein expression in MDA-MB-231 control (mock), *H19*-stably overexpressing cells (H19) or miR-675-stably overexpressing cells (miR-675). Actin was used as an equiloading control.

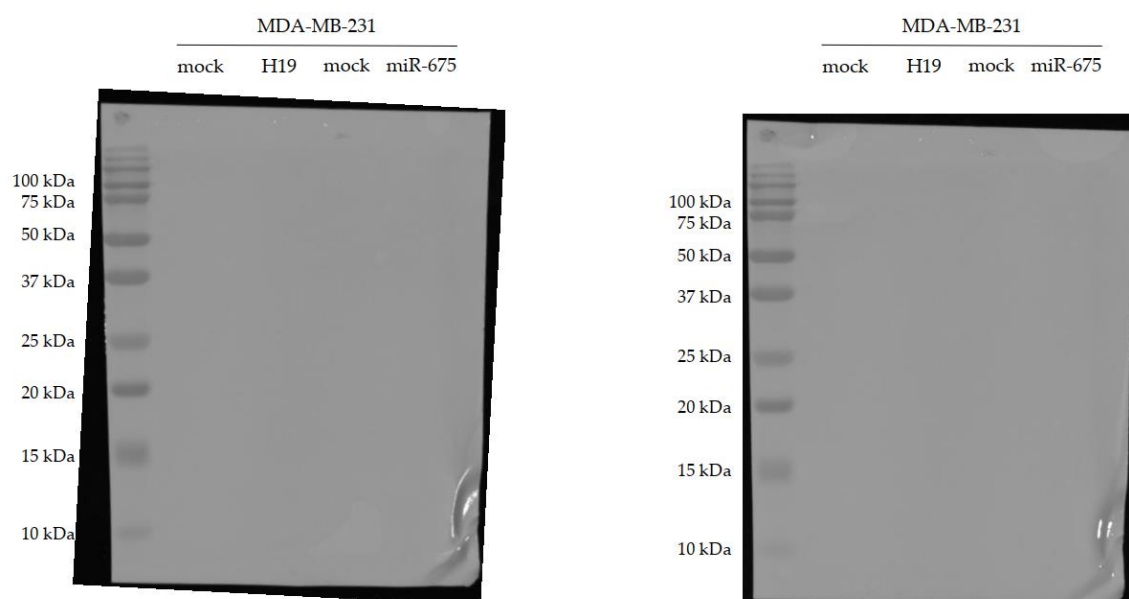

**Figure S11.** Uncropped western blot membranes (visible condition) corresponding to Figure S12.

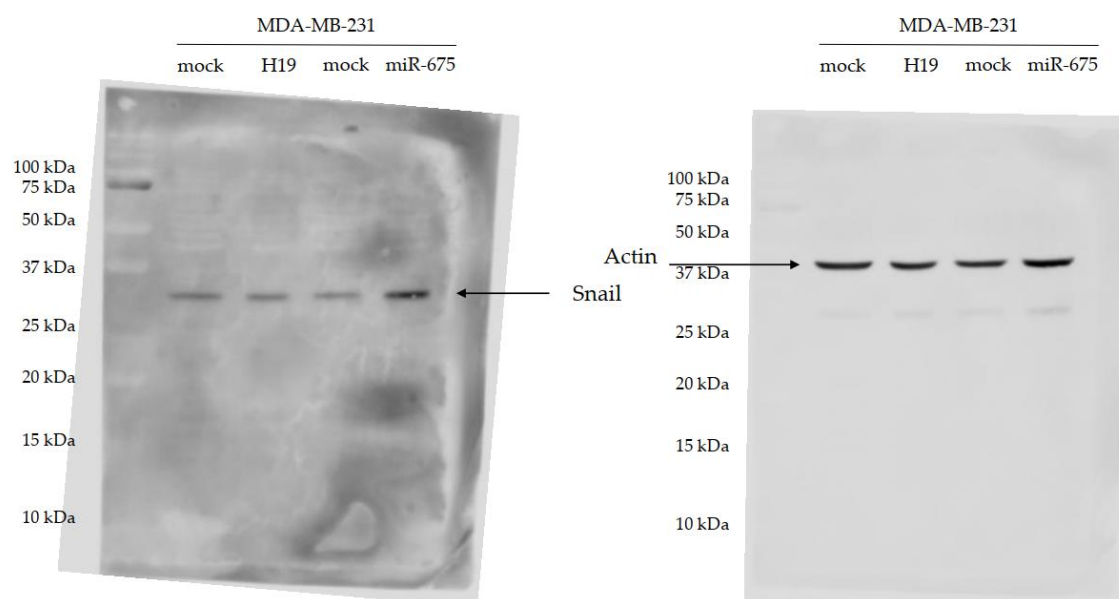

**Figure S12.** Revelation of uncropped western blot membranes showing the detection of snail protein expression in MDA-MB-231 control (mock), *H19*-stably overexpressing cells (H19) or miR-675-stably overexpressing cells (miR-675). Actin was used as an equiloading control.

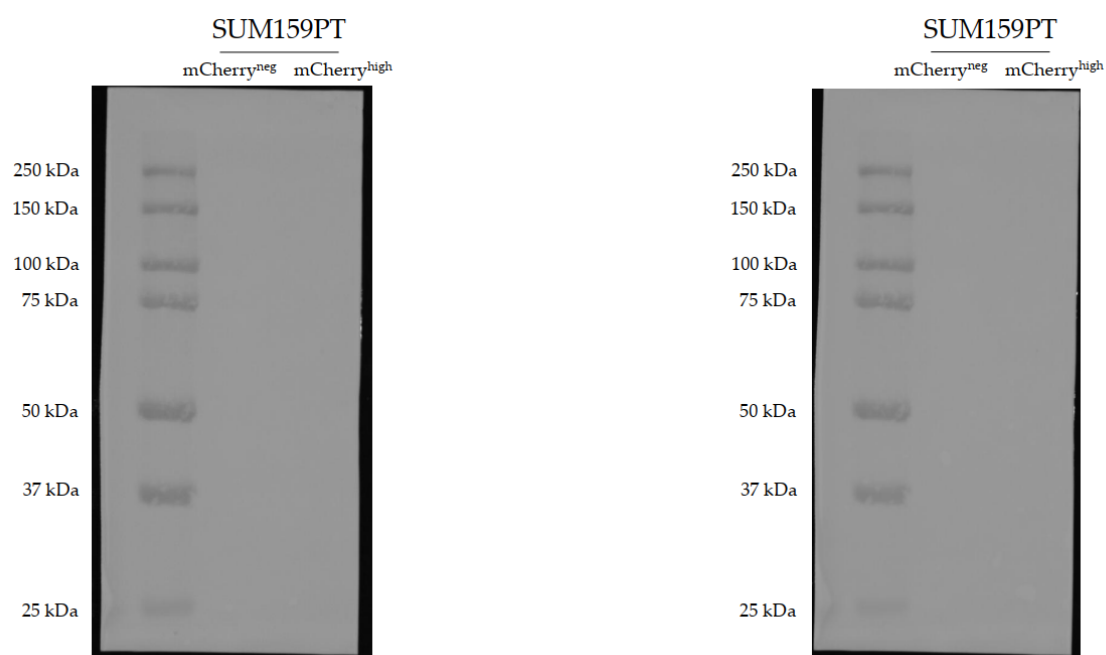

**Figure S13.** Uncropped western blot membranes (visible condition) corresponding to Figure S14.

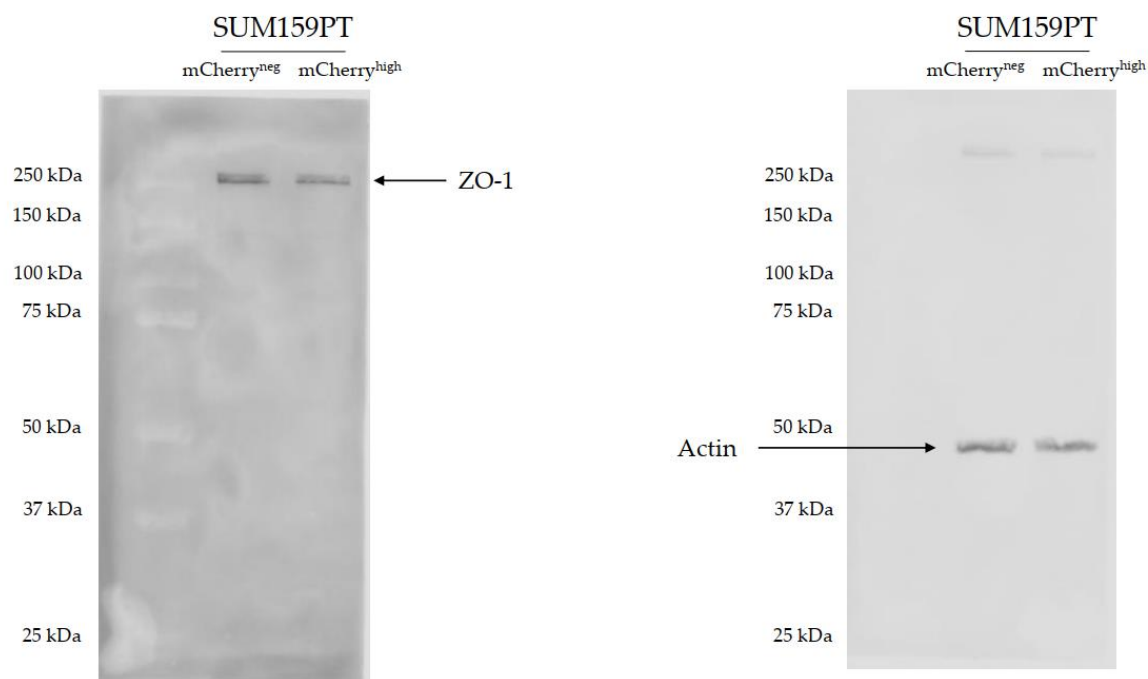

**Figure S14.** Revelation of uncropped western blot membranes showing the detection of ZO-1 protein expression in SUM159PT-pH19-mCherry<sup>neg</sup> (mCherry<sup>neg</sup>) or SUM159PT-pH19-mCherry<sup>high</sup> (mCherry<sup>high</sup>) cells. Actin was used as an equiloading control.

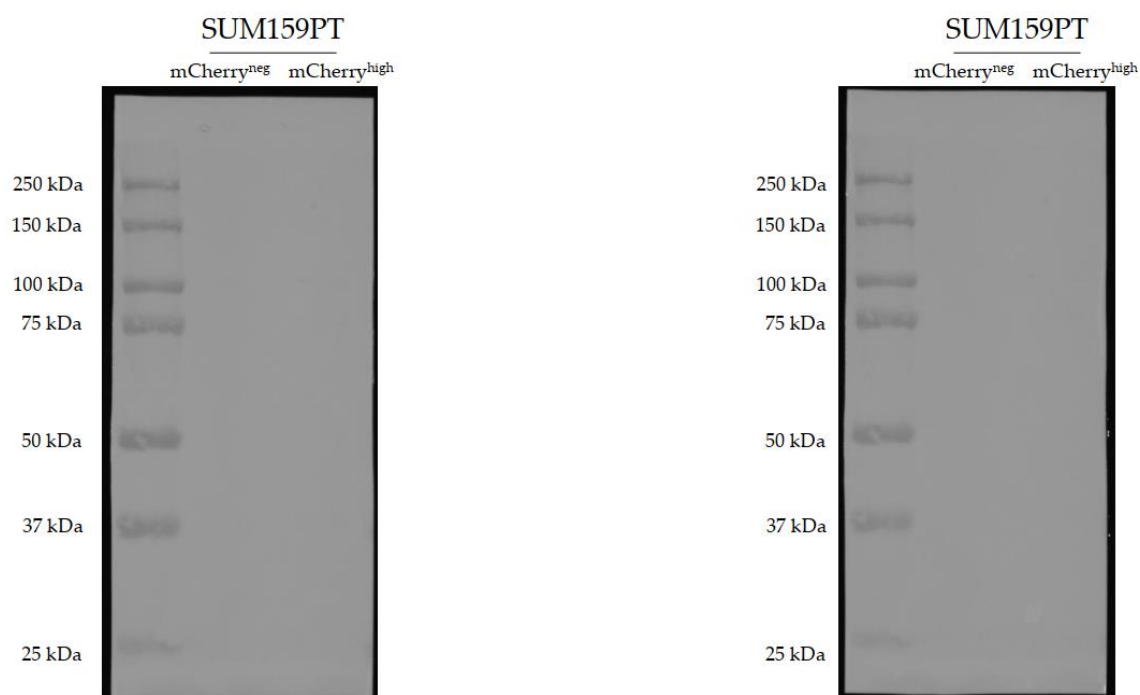

**Figure S15.** Uncropped western blot membranes (visible condition) corresponding to Figure S16.

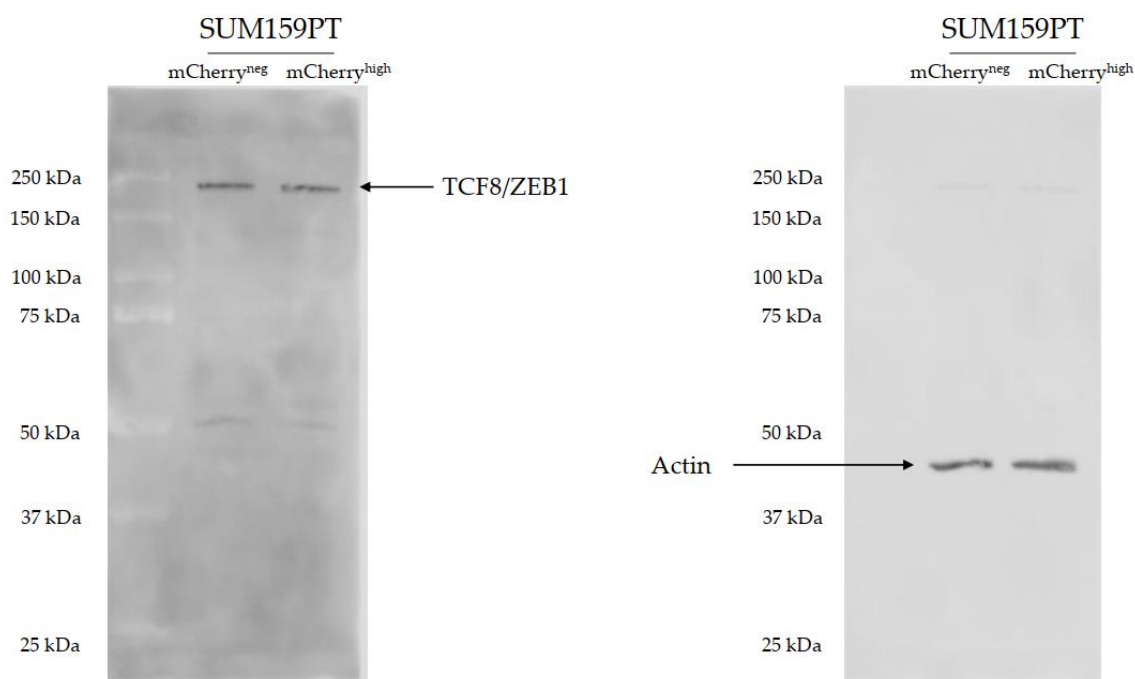

**Figure S16.** Revelation of uncropped western blot membranes showing the detection of TCF8/ZEB1 protein expression in SUM159PT-pH19-mCherry<sup>neg</sup> (mCherry<sup>neg</sup>) or SUM159PT-pH19-mCherry<sup>high</sup> (mCherry<sup>high</sup>) cells. Actin was used as an equiloading control.

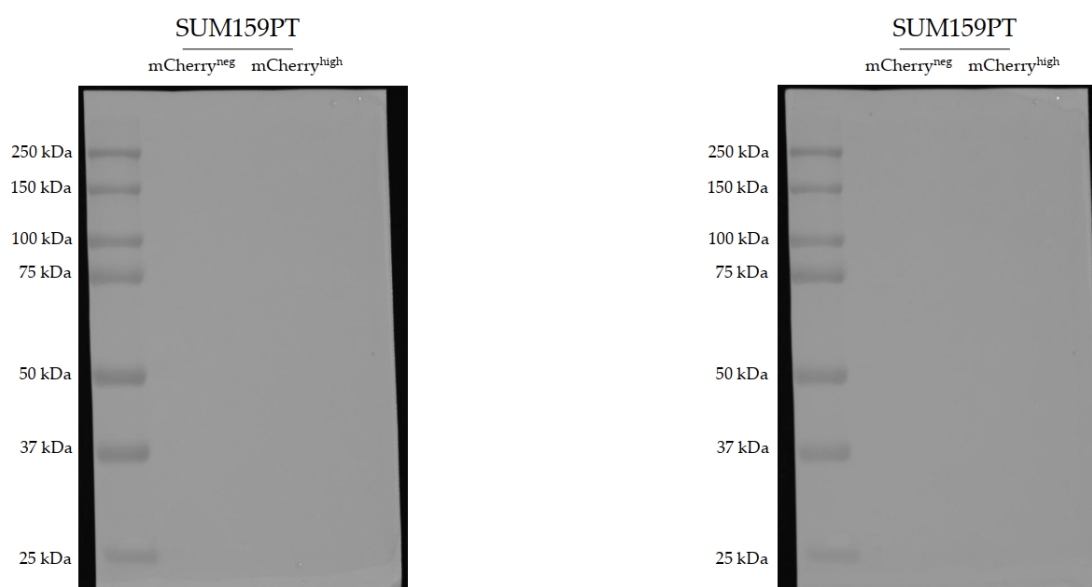

**Figure S17.** Uncropped western blot membranes (visible condition) corresponding to Figure S18.

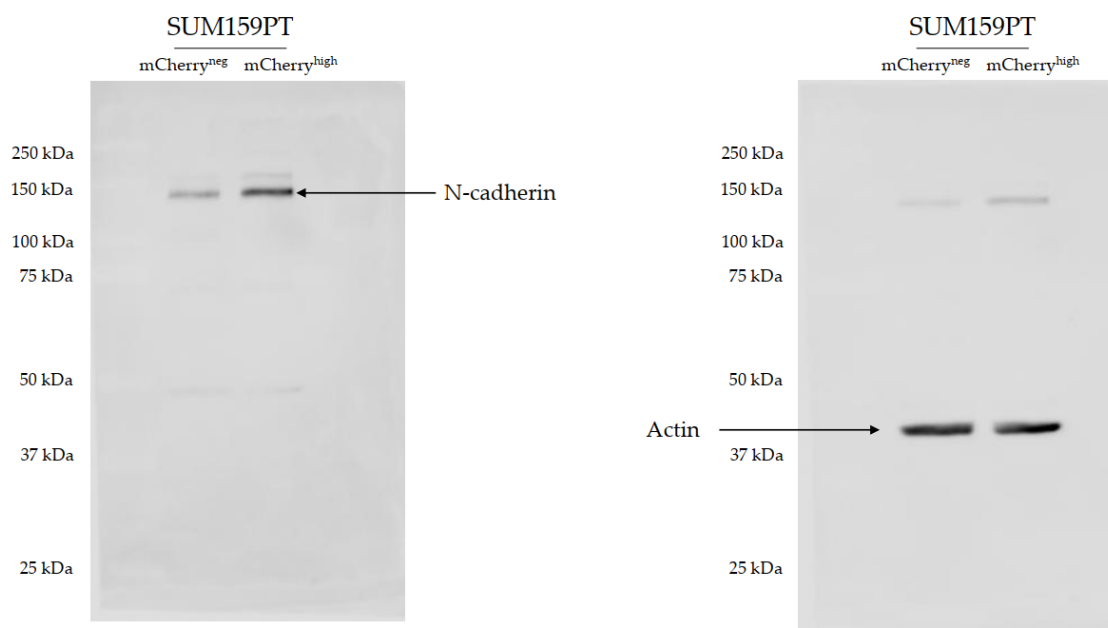

**Figure S18.** Revelation of uncropped western blot membranes showing the detection of N-cadherin protein expression in SUM159PT-pH19-mCherry<sup>neg</sup> (mCherry<sup>neg</sup>) or SUM159PT-pH19-mCherry<sup>high</sup> (mCherry<sup>high</sup>) cells. Actin was used as an equiloading control.

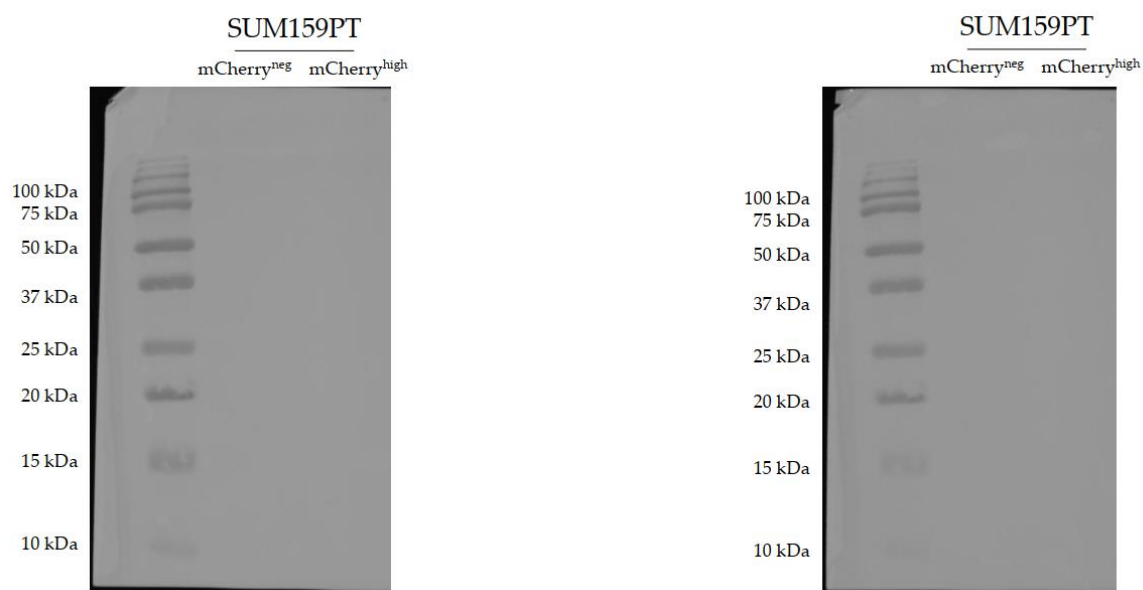

**Figure S19.** Uncropped western blot membranes (visible condition) corresponding to Figure S20.

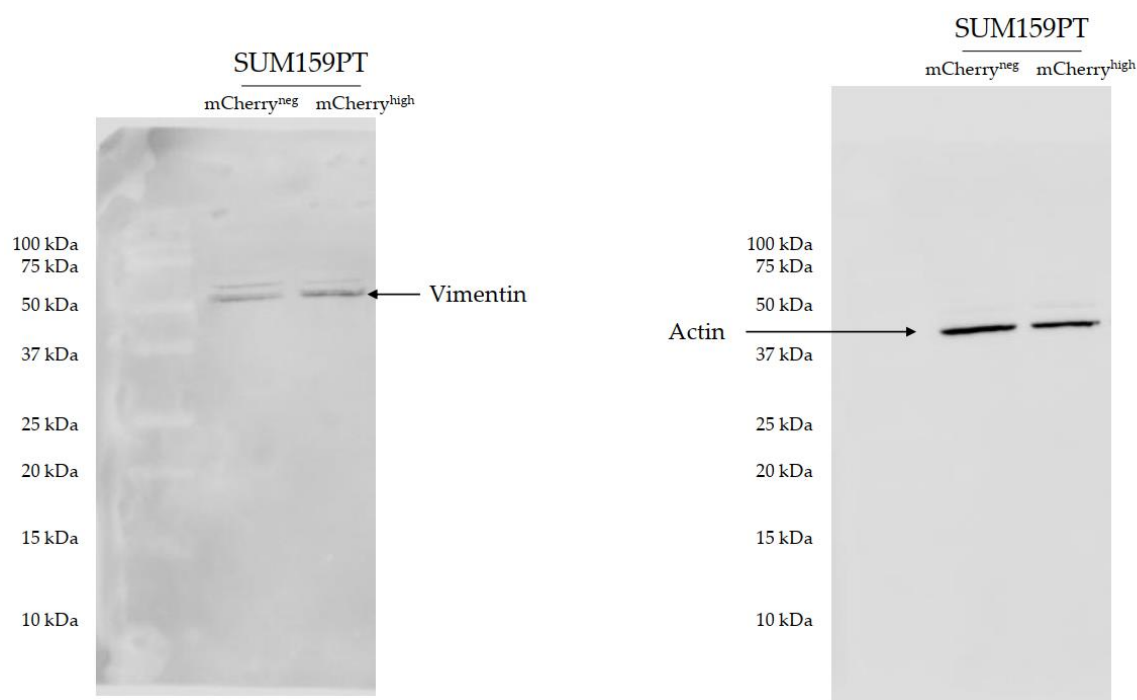

**Figure S20.** Revelation of uncropped western blot membranes showing the detection of vimentin protein expression in SUM159PT-pH19-mCherry<sup>neg</sup> (mCherry<sup>neg</sup>) or SUM159PT-pH19-mCherry<sup>high</sup> (mCherry<sup>high</sup>) cells. Actin was used as an equilloading control.

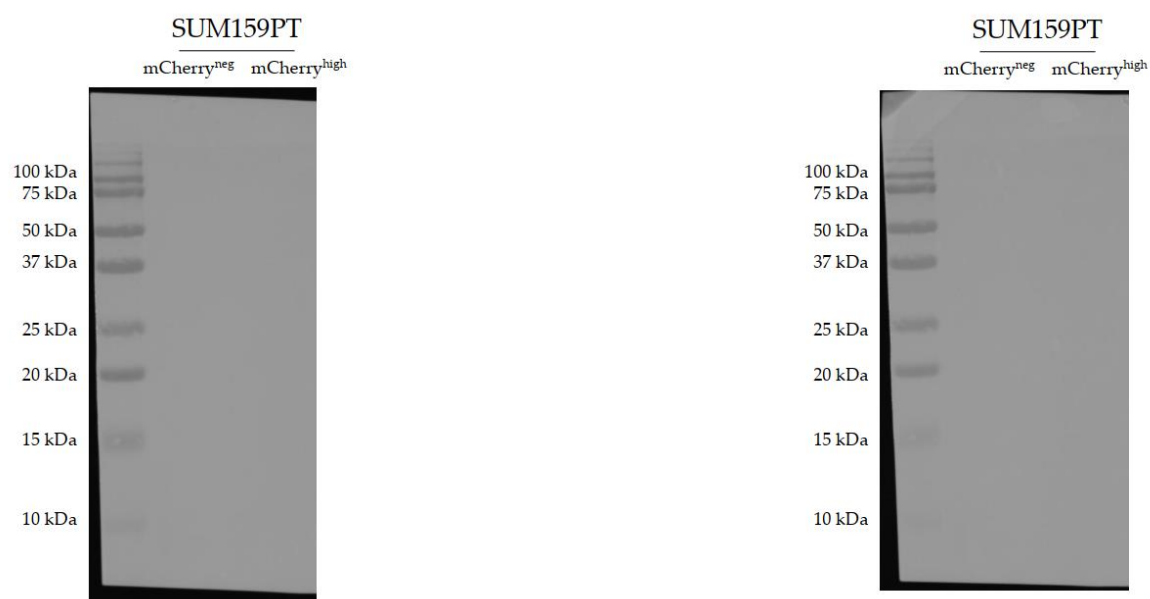

**Figure S21.** Uncropped western blot membranes (visible condition) corresponding to Figure S22.

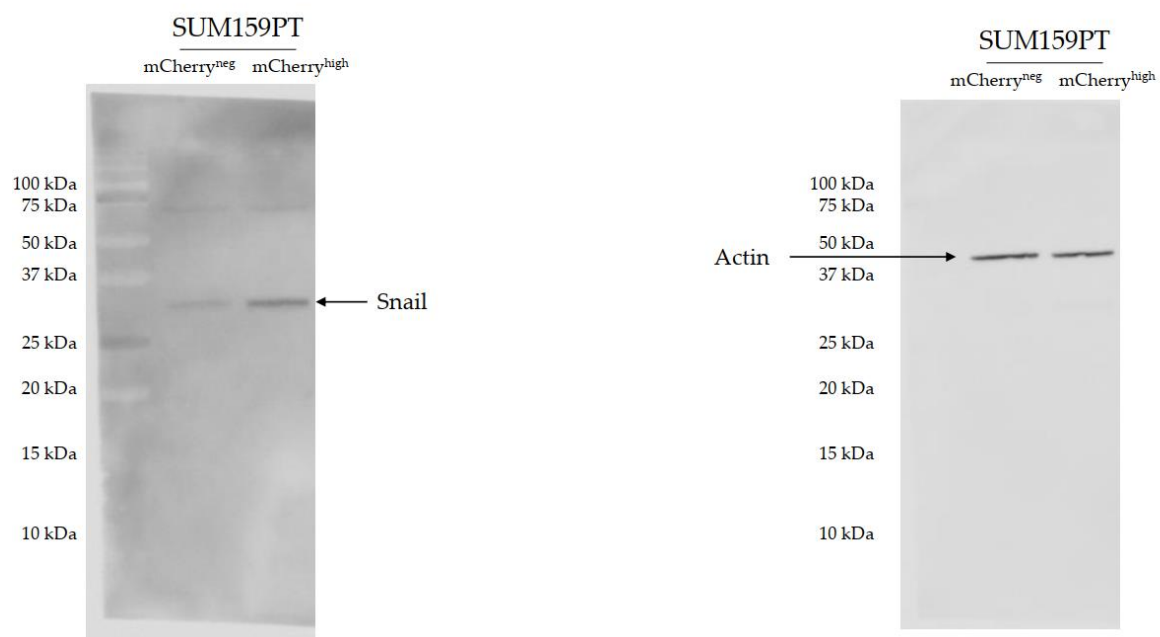

**Figure S22.** Revelation of uncropped western blot membranes showing the detection of snail protein expression in SUM159PT-pH19-mCherry<sup>neg</sup> (mCherry<sup>neg</sup>) or SUM159PT-pH19-mCherry<sup>high</sup> (mCherry<sup>high</sup>) cells. Actin was used as an equiloading control.

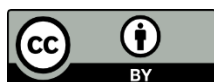

© 2020 by the authors. Licensee MDPI, Basel, Switzerland. This article is an open access article distributed under the terms and conditions of the Creative Commons Attribution (CC BY) license (<http://creativecommons.org/licenses/by/4.0/>).
